# Supplementary material for: In Vitro and In Vivo Evaluation of Epidermal Growth Factor (EGF) Loaded Alginate-Hyaluronic Acid (AlgHA) Microbeads System for Wound Healing
Source: MDPI journal article supplement (doi:10.3390/jfb14080403), 2023-07-28

**Figure S1:** Visual appearance of AlgHa-heparin beads. Scale bar of 500  $\mu\text{m}$ .

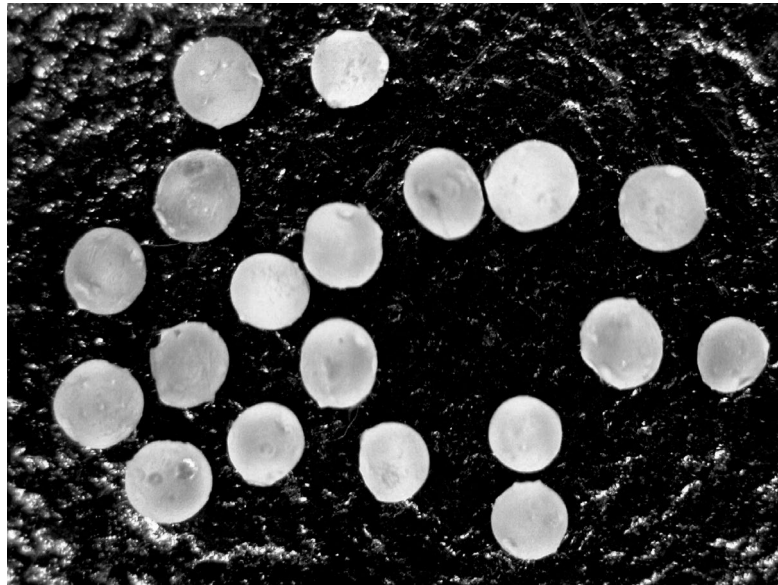

**Figure S2:** L929 fibroblasts (control) and AlgHA-heparin beads' MTT results.

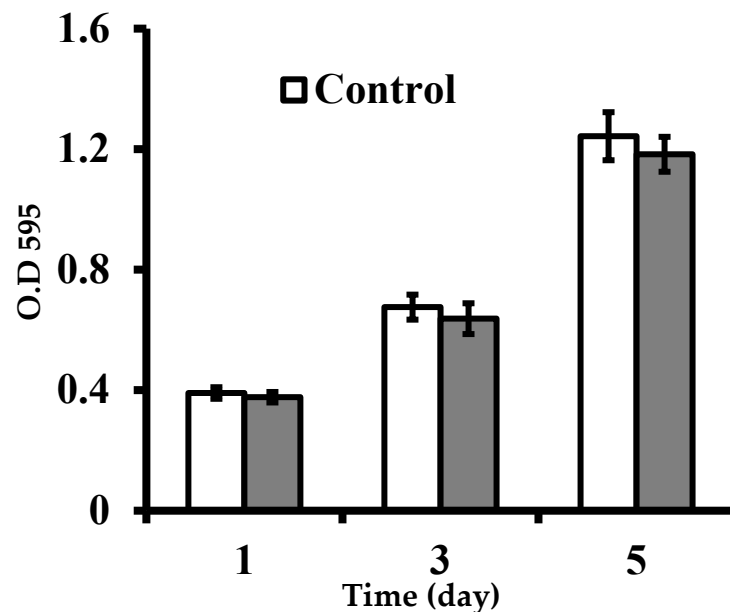

**Figure S3:** Day 7 FLK-1 and ICAM-1 expression in RBMSCs (a and b).

**(a)**

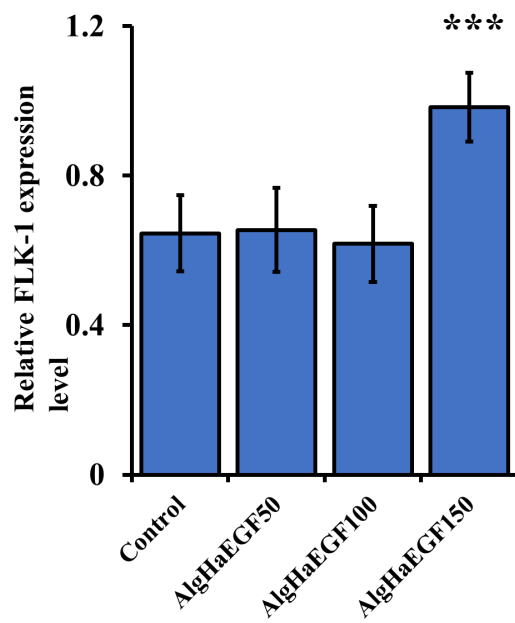

**(b)**

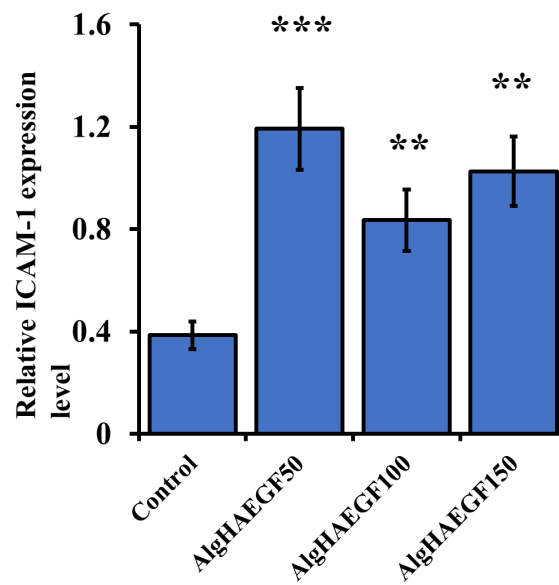

Supplement: s1 [file s1]
